# Supplementary material for: Energetic contributions of residues to the formation of early amyloid-β oligomers
Source: Royal Society of Chemistry journal article supplement (doi:10.1039/c4cp04544k), 2014-12-05
Supplement: c4cp04544k1.pdf [file c4cp04544k1.pdf]

# Supplementary information

## Energetic contributions of residues to the formation of early amyloid- $\beta$ oligomers

*Ramon Pouplana and Josep M. Campanera\**

Departament de Fisicoquímica, Facultat de Farmàcia, Universitat de Barcelona, Av. Joan XXIII,  
s/n, Diagonal Sud, 08028 Barcelona, Catalonia, Spain.

**Table S1.** Characterisation of the secondary structure of oligomers according to DSSP (last 100 ns of each simulation) <sup>1</sup>

|                 | Monomers    | Dimers     | Trimers     | Tetramers  | Octamers   |
|-----------------|-------------|------------|-------------|------------|------------|
| $\beta$ -sheet  | 6 $\pm$ 12  | 7 $\pm$ 5  | 2 $\pm$ 2   | 3 $\pm$ 2  | 2 $\pm$ 1  |
| $\alpha$ -helix | 5 $\pm$ 9   | 9 $\pm$ 6  | 17 $\pm$ 7  | 19 $\pm$ 7 | 17 $\pm$ 4 |
| Turn            | 20 $\pm$ 11 | 18 $\pm$ 5 | 19 $\pm$ 6  | 32 $\pm$ 4 | 23 $\pm$ 4 |
| Coil            | 67 $\pm$ 15 | 66 $\pm$ 6 | 62 $\pm$ 11 | 46 $\pm$ 6 | 58 $\pm$ 4 |

<sup>1</sup>Time evolution of secondary structure elements can be found in Figure S3, S4, S5, S6 and S7.

**Table S2.** The 6 most significant intramonomeric electrostatic stability energies ( $\Delta E_{\text{ele}}^{\text{intra}}$ ) between residues separated by more than four consecutive residues, in kcal/mol.

|         | Dimers        | Trimers         | Tetramers      | Octamers        |
|---------|---------------|-----------------|----------------|-----------------|
| K28-D23 | 0.0 $\pm$ 1.3 | -4.5 $\pm$ 1.3  | -8.9 $\pm$ 1.7 | -14.7 $\pm$ 1.3 |
| K16-E11 | 0.0 $\pm$ 1.3 | -2.3 $\pm$ 0.1  | -9.5 $\pm$ 2.3 | -11.7 $\pm$ 1.1 |
| K28-E22 | 0.0 $\pm$ 0.4 | 2.2 $\pm$ 0.7   | -4.9 $\pm$ 1.8 | -11.0 $\pm$ 1.3 |
| M35-E11 | 0.0 $\pm$ 0.3 | 0.1 $\pm$ 0.1   | -0.6 $\pm$ 0.4 | -8.0 $\pm$ 0.1  |
| D23-K16 | 0.0 $\pm$ 1.8 | -2.7 $\pm$ 1.7  | 4.1 $\pm$ 0.5  | -6.0 $\pm$ 0.9  |
| E22-K16 | 0.0 $\pm$ 0.8 | -22.7 $\pm$ 4.5 | 0.7 $\pm$ 2.3  | -3.0 $\pm$ 1.1  |

**Table S3.** Decomposition of the stability free energy ( $\Delta G_{\text{total}}$ ) and its decomposition into intramonomeric and intermonomeric contributions, in kcal/mol.<sup>a</sup>

|           |        | $\Delta E_{\text{int}}$ | $\Delta E_{\text{ele}}$ | $\Delta E_{\text{vdw}}$ | $\Delta G_{\text{sol,pol}}$ | $\Delta G_{\text{sol,apol}}$ | $\Delta G_{\text{total}}$ |
|-----------|--------|-------------------------|-------------------------|-------------------------|-----------------------------|------------------------------|---------------------------|
| Dimers    | Global | $0.0 \pm 10.7$          | $-71.9 \pm 30.9$        | $-35.4 \pm 8.1$         | $86.5 \pm 29.3$             | $-5.7 \pm 0.8$               | $-26.4 \pm 12.1$          |
|           | Intra  | $0.0 \pm 10.7$          | $0.0 \pm 36.8$          | $0.0 \pm 9.9$           | $0.0 \pm 36.0$              | $0.0 \pm 1.3$                | $0.0 \pm 13.7$            |
|           | Inter  | $0.0 \pm 0.0$           | $-71.9 \pm 32.8$        | $-35.4 \pm 5.9$         | $86.5 \pm 32.3$             | $-5.7 \pm 1.1$               | $-26.4 \pm 6.3$           |
| Trimers   | Global | $5.6 \pm 8.5$           | $-121.0 \pm 24.7$       | $-46.4 \pm 8.0$         | $135.1 \pm 22.6$            | $-7.5 \pm 1.0$               | $-34.3 \pm 10.4$          |
|           | Intra  | $5.6 \pm 8.5$           | $-42.3 \pm 33.1$        | $-5.2 \pm 7.2$          | $36.6 \pm 32.6$             | $-1.0 \pm 1.1$               | $-6.4 \pm 10.5$           |
|           | Inter  | $0.0 \pm 0.0$           | $-78.7 \pm 28.5$        | $-41.2 \pm 8.6$         | $98.5 \pm 29.2$             | $-6.4 \pm 1.3$               | $-27.8 \pm 4.5$           |
| Tetramers | Global | $5.0 \pm 7.3$           | $-96.9 \pm 23.7$        | $-49.5 \pm 6.0$         | $116.7 \pm 23.2$            | $-7.8 \pm 0.6$               | $-32.6 \pm 8.7$           |
|           | Intra  | $5.0 \pm 7.3$           | $-27.0 \pm 22.4$        | $-6.1 \pm 5.9$          | $23.6 \pm 20.8$             | $-0.9 \pm 0.8$               | $-5.3 \pm 9.0$            |
|           | Inter  | $0.0 \pm 0.0$           | $-70.0 \pm 18.2$        | $-43.4 \pm 7.8$         | $93.0 \pm 19.2$             | $-6.9 \pm 1.1$               | $-27.3 \pm 6.4$           |
| Octamers  | Global | $5.5 \pm 5.2$           | $-103.1 \pm 23.3$       | $-59.7 \pm 4.8$         | $132.0 \pm 23.0$            | $-9.8 \pm 0.7$               | $-35.2 \pm 6.8$           |
|           | Intra  | $5.5 \pm 5.2$           | $-30.0 \pm 12.5$        | $0.5 \pm 4.6$           | $26.1 \pm 11.7$             | $-0.2 \pm 0.7$               | $1.9 \pm 6.1$             |
|           | Inter  | $0.0 \pm 0.0$           | $-73.1 \pm 25.5$        | $-60.2 \pm 4.1$         | $105.8 \pm 24.1$            | $-9.6 \pm 0.5$               | $-37.1 \pm 3.6$           |

<sup>a</sup> All energy terms are referenced to the averaged energy profile of both monomers of the dimer and consequently the intramonomeric terms of the dimer are computed to be null.

**Table S4.** Residue decomposition splitted by intra and inter contributions of the vdW stability energy ( $\Delta E_{\text{vdw}}$ ) for all oligomers, in kcal/mol.<sup>a</sup>

|                    | Dimers |                    |       | Trimers |       |       | Tetramers |       |       | Octamers |       |       |
|--------------------|--------|--------------------|-------|---------|-------|-------|-----------|-------|-------|----------|-------|-------|
|                    | Total  | Intra <sup>b</sup> | Inter | Total   | Intra | Inter | Total     | Intra | Inter | Total    | Intra | Inter |
| Y10                | -4.2   | 0.0                | -4.2  | -5.3    | -1.6  | -3.7  | -5.8      | -1.3  | -4.5  | -4.5     | -1.2  | -3.3  |
| E11                | -1.9   | 0.0                | -1.9  | -1.7    | -0.5  | -1.3  | -1.9      | -0.9  | -1.0  | -1.8     | -0.4  | -1.4  |
| V12                | -2.8   | 0.0                | -2.8  | -4.4    | -1.5  | -2.9  | -3.6      | -1.1  | -2.5  | -2.8     | -0.9  | -1.9  |
| H13                | -1.5   | 0.0                | -1.5  | -3.4    | -0.3  | -3.1  | -2.5      | -0.5  | -2.0  | -2.6     | -0.3  | -2.3  |
| H14                | -1.6   | 0.0                | -1.6  | -2.8    | -0.9  | -1.9  | -3.2      | -1.8  | -1.4  | -4.1     | -1.3  | -2.8  |
| Q15                | -2.1   | 0.0                | -2.1  | -3.2    | -1.1  | -2.1  | -3.8      | -1.8  | -2.0  | -3.6     | -1.6  | -2.0  |
| K16                | -1.8   | 0.0                | -1.8  | -2.8    | -0.6  | -2.1  | -2.2      | -0.6  | -1.6  | -2.9     | -1.1  | -1.8  |
| L17                | -2.2   | 0.0                | -2.2  | -1.6    | 0.6   | -2.2  | -1.6      | 0.7   | -2.3  | -2.4     | 0.4   | -2.8  |
| V18                | -1.3   | 0.0                | -1.3  | -1.1    | 0.4   | -1.5  | -2.0      | 0.0   | -2.0  | -2.4     | -0.1  | -2.3  |
| F19                | -0.9   | 0.0                | -0.9  | -3.1    | -0.4  | -2.7  | -4.0      | -0.3  | -3.7  | -4.8     | 0.4   | -5.2  |
| F20                | -1.9   | 0.0                | -1.9  | -2.9    | -1.2  | -1.7  | -3.3      | -0.7  | -2.5  | -2.9     | 0.6   | -3.6  |
| A21                | -0.3   | 0.0                | -0.3  | -1.3    | -0.6  | -0.7  | -0.7      | 0.2   | -0.8  | -1.3     | -0.1  | -1.2  |
| E22                | -0.4   | 0.0                | -0.4  | -1.6    | -0.4  | -1.2  | -1.3      | -0.4  | -0.9  | -2.3     | -0.6  | -1.6  |
| D23                | -0.3   | 0.0                | -0.3  | -0.7    | -0.2  | -0.6  | -1.1      | -0.4  | -0.8  | -1.8     | -0.5  | -1.3  |
| V24                | -0.5   | 0.0                | -0.5  | -1.1    | -0.1  | -0.9  | -1.3      | -0.2  | -1.1  | -2.4     | -0.6  | -1.8  |
| G25                | -0.4   | 0.0                | -0.4  | -1.2    | -0.4  | -0.8  | -1.0      | -0.2  | -0.8  | -1.5     | -0.5  | -1.1  |
| S26                | -0.5   | 0.0                | -0.5  | -0.7    | 0.1   | -0.9  | -0.7      | 0.4   | -1.2  | -1.5     | 0.4   | -1.9  |
| N27                | -0.8   | 0.0                | -0.8  | -0.4    | 0.5   | -0.8  | -0.6      | 0.4   | -1.0  | -2.2     | 0.5   | -2.7  |
| K28                | -1.2   | 0.0                | -1.2  | 0.0     | 0.9   | -0.9  | 0.1       | 1.2   | -1.1  | -1.1     | 1.1   | -2.2  |
| G29                | -0.5   | 0.0                | -0.5  | -0.5    | 0.4   | -0.9  | -0.5      | 0.4   | -0.8  | -0.3     | 0.9   | -1.3  |
| A30                | -0.8   | 0.0                | -0.8  | -0.6    | 0.5   | -1.0  | -0.8      | 0.5   | -1.3  | -0.7     | 1.0   | -1.6  |
| I31                | -1.7   | 0.0                | -1.7  | -0.6    | 0.9   | -1.5  | -1.3      | 0.8   | -2.2  | -1.7     | 1.6   | -3.2  |
| I32                | -2.0   | 0.0                | -2.0  | -0.7    | 0.4   | -1.1  | -1.2      | 0.2   | -1.4  | -2.1     | 1.3   | -3.4  |
| G33                | -0.9   | 0.0                | -0.9  | -0.7    | 0.2   | -0.9  | -1.0      | -0.1  | -0.8  | -1.1     | 0.4   | -1.5  |
| L34                | -1.8   | 0.0                | -1.8  | -2.0    | -0.1  | -1.9  | -1.9      | -0.3  | -1.6  | -3.0     | 0.4   | -3.4  |
| M35                | -1.2   | 0.0                | -1.2  | -2.0    | -0.1  | -1.8  | -2.1      | -0.1  | -2.1  | -1.8     | 0.8   | -2.7  |
| Total <sup>c</sup> | -35.4  | 0.0                | -35.4 | -46.4   | -5.2  | -41.2 | -49.5     | -6.1  | -43.4 | -59.7    | 0.5   | -60.2 |

<sup>a</sup> Standard deviation is listed Table S5. <sup>b</sup> The intra vdW interaction for dimer is computed to be null since it is taken as a reference structure. <sup>c</sup> The sum of the columns give rise to the total values presented in Table S3.

**Table S5.** Standard deviation of residue decomposition splitted by intra and inter contributions of the vdW stability energy ( $\Delta E_{\text{vdw}}$ ) for all oligomers, in kcal/mol.<sup>a</sup>

|     | Dimers |       |       | Trimers |       |       | Tetramers |       |       | Octamers |       |       |
|-----|--------|-------|-------|---------|-------|-------|-----------|-------|-------|----------|-------|-------|
|     | Total  | Intra | Inter | Total   | Intra | Inter | Total     | Intra | Inter | Total    | Intra | Inter |
| Y10 | 1.8    | 0.9   | 1.4   | 1.0     | 0.8   | 0.6   | 1.1       | 0.7   | 1.0   | 0.9      | 0.5   | 0.7   |
| E11 | 1.6    | 1.0   | 0.9   | 0.9     | 1.0   | 0.6   | 0.9       | 0.8   | 0.4   | 0.6      | 0.6   | 0.3   |
| V12 | 1.6    | 1.0   | 1.1   | 1.0     | 0.9   | 0.5   | 1.2       | 0.7   | 1.0   | 0.7      | 0.5   | 0.5   |
| H13 | 1.1    | 1.1   | 0.6   | 1.0     | 1.1   | 0.8   | 0.9       | 0.6   | 0.6   | 0.8      | 0.4   | 0.5   |
| H14 | 1.3    | 0.9   | 0.8   | 1.0     | 1.0   | 0.8   | 1.4       | 0.7   | 1.2   | 0.7      | 0.5   | 0.6   |
| Q15 | 2.1    | 1.6   | 0.9   | 0.9     | 0.9   | 0.6   | 0.9       | 0.8   | 0.4   | 0.7      | 0.6   | 0.6   |
| K16 | 1.2    | 1.0   | 1.0   | 1.1     | 0.8   | 0.7   | 0.8       | 0.7   | 0.5   | 0.6      | 0.5   | 0.4   |
| L17 | 2.2    | 1.4   | 1.3   | 1.6     | 0.9   | 1.2   | 1.3       | 0.8   | 1.1   | 0.7      | 0.6   | 0.3   |
| V18 | 1.0    | 1.1   | 0.8   | 1.1     | 0.9   | 0.7   | 0.9       | 0.7   | 0.7   | 0.6      | 0.5   | 0.4   |
| F19 | 1.6    | 1.3   | 0.7   | 0.9     | 1.0   | 1.1   | 1.3       | 0.9   | 1.2   | 1.3      | 0.7   | 1.1   |
| F20 | 2.4    | 1.5   | 1.6   | 1.1     | 0.8   | 0.9   | 1.1       | 1.2   | 1.0   | 1.2      | 0.6   | 0.9   |
| A21 | 0.7    | 0.7   | 0.3   | 0.6     | 0.5   | 0.3   | 0.7       | 0.4   | 0.6   | 0.4      | 0.5   | 0.3   |
| E22 | 1.0    | 0.9   | 0.5   | 0.9     | 0.9   | 0.7   | 0.8       | 0.6   | 0.5   | 0.7      | 0.7   | 0.4   |
| D23 | 1.0    | 1.0   | 0.4   | 0.9     | 0.9   | 0.4   | 0.8       | 0.8   | 0.6   | 0.7      | 0.7   | 0.4   |
| V24 | 1.3    | 1.2   | 0.4   | 1.2     | 1.0   | 0.7   | 1.0       | 0.9   | 0.5   | 0.7      | 0.6   | 0.4   |
| G25 | 0.7    | 0.6   | 0.4   | 0.8     | 0.6   | 0.4   | 0.6       | 0.4   | 0.5   | 0.4      | 0.4   | 0.3   |
| S26 | 1.3    | 1.2   | 0.7   | 0.8     | 0.7   | 0.5   | 1.2       | 0.7   | 0.7   | 0.7      | 0.7   | 0.6   |
| N27 | 1.7    | 1.7   | 0.7   | 0.8     | 0.7   | 0.4   | 1.0       | 0.6   | 0.8   | 0.9      | 0.8   | 0.5   |
| K28 | 1.4    | 1.5   | 0.6   | 1.0     | 1.1   | 0.8   | 1.0       | 0.7   | 0.7   | 0.8      | 0.7   | 0.5   |
| G29 | 1.2    | 1.1   | 0.3   | 0.7     | 0.7   | 0.6   | 0.6       | 0.5   | 0.5   | 0.4      | 0.4   | 0.2   |
| A30 | 1.0    | 0.9   | 0.6   | 0.8     | 0.6   | 0.6   | 0.7       | 0.5   | 0.7   | 0.5      | 0.5   | 0.3   |
| I31 | 1.7    | 1.6   | 1.7   | 1.3     | 1.0   | 0.8   | 1.2       | 1.3   | 0.7   | 0.9      | 0.9   | 0.5   |
| I32 | 2.0    | 1.5   | 1.2   | 1.1     | 1.2   | 0.4   | 1.3       | 1.2   | 0.4   | 1.3      | 0.9   | 0.9   |
| G33 | 0.7    | 0.6   | 0.5   | 0.6     | 0.4   | 0.5   | 0.7       | 0.4   | 0.4   | 0.4      | 0.2   | 0.3   |
| L34 | 1.3    | 1.1   | 0.6   | 1.1     | 1.0   | 0.5   | 1.2       | 0.9   | 0.5   | 1.0      | 0.7   | 0.6   |
| M35 | 1.5    | 1.4   | 0.9   | 1.2     | 1.1   | 1.1   | 1.0       | 0.8   | 0.8   | 0.8      | 0.5   | 0.6   |

**Table S6.** Residue decomposition splitted by intra and inter contributions of the total stability free energy ( $\Delta G_{\text{total}}$ ) for all oligomers, in kcal/mol.<sup>a</sup>

|                    | Dimers |                    |       | Trimers |       |       | Tetramers |       |       | Octamers |       |       |
|--------------------|--------|--------------------|-------|---------|-------|-------|-----------|-------|-------|----------|-------|-------|
|                    | Total  | Intra <sup>b</sup> | Inter | Total   | Intra | Inter | Total     | Intra | Inter | Total    | Intra | Inter |
| Y10                | 0.6    | 0.0                | 0.6   | -0.2    | -0.4  | 0.3   | -0.2      | -0.2  | 0.0   | 0.3      | -0.4  | 0.7   |
| E11                | -2.0   | 0.0                | -2.0  | -1.3    | -0.7  | -0.6  | -1.3      | -0.9  | -0.4  | 0.0      | -0.3  | 0.4   |
| V12                | -3.5   | 0.0                | -3.5  | -4.4    | -1.6  | -2.7  | -3.8      | -1.3  | -2.5  | -3.0     | -1.3  | -1.8  |
| H13                | -1.7   | 0.0                | -1.7  | -2.4    | 0.1   | -2.6  | -1.7      | -0.2  | -1.5  | -1.7     | 0.0   | -1.7  |
| H14                | -0.8   | 0.0                | -0.8  | -1.4    | -0.4  | -1.0  | -2.0      | -1.0  | -0.9  | -2.3     | -0.4  | -2.0  |
| Q15                | -1.9   | 0.0                | -1.9  | -3.9    | -1.7  | -2.3  | -3.9      | -2.2  | -1.7  | -1.9     | -1.1  | -0.8  |
| K16                | -1.4   | 0.0                | -1.4  | -3.6    | -1.6  | -2.0  | -1.2      | -1.1  | -0.1  | -2.6     | -1.4  | -1.3  |
| L17                | -2.1   | 0.0                | -2.1  | -2.4    | -0.2  | -2.1  | -2.2      | -0.2  | -2.0  | -2.6     | -0.3  | -2.4  |
| V18                | -1.4   | 0.0                | -1.4  | -1.1    | 0.1   | -1.3  | -1.7      | 0.1   | -1.8  | -1.6     | 0.1   | -1.8  |
| F19                | -0.8   | 0.0                | -0.8  | -3.5    | -0.9  | -2.5  | -4.0      | -0.6  | -3.4  | -3.7     | 0.9   | -4.5  |
| F20                | -1.7   | 0.0                | -1.7  | -2.8    | -1.5  | -1.3  | -2.7      | -0.6  | -2.1  | -3.4     | -0.4  | -3.0  |
| A21                | -0.1   | 0.0                | -0.1  | -1.1    | -0.6  | -0.5  | -0.4      | 0.2   | -0.6  | -1.5     | -0.8  | -0.7  |
| E22                | 0.2    | 0.0                | 0.2   | -1.2    | -0.6  | -0.6  | -0.1      | -0.5  | 0.4   | 0.1      | -0.5  | 0.5   |
| D23                | 0.3    | 0.0                | 0.3   | -0.4    | -0.5  | 0.0   | -0.1      | -0.5  | 0.4   | 0.1      | -0.3  | 0.4   |
| V24                | -0.7   | 0.0                | -0.7  | -1.0    | -0.4  | -0.7  | -1.3      | -0.3  | -1.0  | -2.0     | -0.6  | -1.4  |
| G25                | -0.2   | 0.0                | -0.2  | -0.3    | 0.1   | -0.4  | 0.1       | 0.6   | -0.5  | -0.2     | 0.6   | -0.8  |
| S26                | -0.5   | 0.0                | -0.5  | 0.0     | 0.2   | -0.3  | -0.2      | 0.5   | -0.6  | -0.3     | 0.6   | -0.9  |
| N27                | -0.3   | 0.0                | -0.3  | -0.2    | 0.0   | -0.2  | -0.4      | -0.2  | -0.2  | -1.7     | 0.0   | -1.8  |
| K28                | -1.0   | 0.0                | -1.0  | -0.3    | 0.0   | -0.4  | -0.7      | -0.1  | -0.7  | -1.7     | -0.3  | -1.4  |
| G29                | -0.3   | 0.0                | -0.3  | 0.3     | 0.8   | -0.5  | 0.5       | 0.8   | -0.3  | 0.8      | 1.3   | -0.5  |
| A30                | -0.6   | 0.0                | -0.6  | 0.2     | 0.8   | -0.7  | -0.5      | 0.7   | -1.1  | 0.0      | 1.2   | -1.2  |
| I31                | -1.5   | 0.0                | -1.5  | 0.3     | 1.5   | -1.2  | -0.9      | 1.2   | -2.1  | -1.0     | 1.9   | -2.9  |
| I32                | -2.0   | 0.0                | -2.0  | 0.5     | 1.3   | -0.9  | -0.5      | 0.9   | -1.4  | -1.2     | 2.1   | -3.2  |
| G33                | -0.6   | 0.0                | -0.6  | -0.4    | 0.3   | -0.7  | -0.3      | 0.1   | -0.4  | -0.5     | 0.4   | -1.0  |
| L34                | -1.8   | 0.0                | -1.8  | -2.7    | -0.9  | -1.8  | -2.1      | -0.7  | -1.4  | -3.2     | 0.1   | -3.2  |
| M35                | -0.5   | 0.0                | -0.5  | -0.6    | 0.2   | -0.8  | -1.1      | 0.1   | -1.2  | -0.3     | 0.8   | -1.1  |
| Total <sup>c</sup> | -26.4  | 0.0                | -26.4 | -34.3   | -6.4  | -27.8 | -32.6     | -5.3  | -27.3 | -35.2    | 1.9   | -37.1 |

<sup>a</sup> Standard deviation is listed Table S7. <sup>b</sup> The intra vdw interaction for dimer is computed to be null since it is taken as a reference structure. <sup>c</sup> The sum of the columns give rise to the total values presented in Table S3.

**Table S7.** Standard deviation of residue decomposition splitted by intra and inter contributions of the *total* stability free energy ( $\Delta G_{\text{total}}$ ) for all aggregates, in kcal/mol.<sup>a</sup>

|     | Dimers |       |       | Trimers |       |       | Tetramers |       |       | Octamers |       |       |
|-----|--------|-------|-------|---------|-------|-------|-----------|-------|-------|----------|-------|-------|
|     | Total  | Intra | Inter | Total   | Intra | Inter | Total     | Intra | Inter | Total    | Intra | Inter |
| Y10 | 2.8    | 2.5   | 1.4   | 2.4     | 2.1   | 1.1   | 2.0       | 1.8   | 1.0   | 1.5      | 1.3   | 0.6   |
| E11 | 2.5    | 2.0   | 1.7   | 1.7     | 1.7   | 0.6   | 1.5       | 1.5   | 0.4   | 1.2      | 1.1   | 0.7   |
| V12 | 2.6    | 2.0   | 1.4   | 1.8     | 1.8   | 0.4   | 1.9       | 1.5   | 1.1   | 1.2      | 1.1   | 0.6   |
| H13 | 2.2    | 2.1   | 0.5   | 2.0     | 1.9   | 0.8   | 1.5       | 1.5   | 0.5   | 1.4      | 1.1   | 0.7   |
| H14 | 2.2    | 2.1   | 0.7   | 1.9     | 1.7   | 0.6   | 1.9       | 1.5   | 1.2   | 1.3      | 1.1   | 0.7   |
| Q15 | 3.2    | 2.3   | 1.5   | 2.1     | 1.9   | 1.1   | 2.2       | 1.8   | 1.0   | 1.2      | 1.2   | 0.5   |
| K16 | 2.8    | 2.6   | 1.3   | 2.4     | 2.2   | 1.1   | 2.2       | 1.9   | 0.7   | 1.5      | 1.3   | 0.6   |
| L17 | 2.9    | 2.3   | 1.4   | 2.6     | 1.9   | 1.1   | 2.2       | 1.7   | 1.1   | 1.1      | 1.1   | 0.3   |
| V18 | 2.1    | 2.1   | 1.1   | 1.8     | 1.6   | 0.7   | 1.5       | 1.5   | 0.7   | 1.2      | 1.0   | 0.4   |
| F19 | 2.8    | 2.6   | 0.8   | 2.0     | 1.9   | 1.1   | 2.0       | 1.9   | 1.2   | 1.5      | 1.2   | 0.9   |
| F20 | 2.9    | 2.3   | 1.6   | 2.3     | 2.0   | 1.0   | 1.9       | 1.8   | 1.0   | 1.6      | 1.2   | 0.9   |
| A21 | 1.7    | 1.6   | 0.3   | 1.3     | 1.3   | 0.4   | 1.2       | 1.2   | 0.6   | 0.8      | 0.8   | 0.3   |
| E22 | 2.1    | 2.0   | 0.4   | 2.4     | 1.9   | 0.9   | 1.5       | 1.4   | 0.4   | 1.1      | 1.0   | 0.5   |
| D23 | 1.9    | 1.9   | 0.3   | 1.6     | 1.6   | 0.6   | 1.4       | 1.4   | 0.4   | 1.1      | 0.9   | 0.6   |
| V24 | 2.5    | 2.3   | 0.6   | 1.8     | 1.6   | 0.6   | 1.8       | 1.6   | 0.5   | 1.1      | 1.0   | 0.4   |
| G25 | 1.5    | 1.4   | 0.4   | 1.3     | 1.1   | 0.3   | 1.0       | 1.0   | 0.5   | 0.9      | 0.8   | 0.4   |
| S26 | 1.9    | 1.9   | 1.1   | 1.5     | 1.4   | 0.4   | 1.7       | 1.3   | 0.9   | 1.0      | 0.9   | 0.7   |
| N27 | 2.7    | 2.6   | 0.6   | 1.8     | 1.7   | 0.5   | 1.6       | 1.5   | 0.4   | 1.2      | 1.2   | 0.8   |
| K28 | 2.7    | 2.8   | 1.3   | 2.0     | 2.1   | 0.6   | 1.9       | 1.9   | 0.6   | 1.4      | 1.3   | 0.7   |
| G29 | 1.7    | 1.6   | 0.4   | 1.2     | 1.2   | 0.6   | 1.0       | 1.0   | 0.5   | 0.8      | 0.8   | 0.2   |
| A30 | 2.1    | 1.7   | 0.8   | 1.5     | 1.4   | 0.5   | 1.5       | 1.2   | 0.9   | 1.0      | 0.9   | 0.4   |
| I31 | 2.5    | 2.6   | 1.5   | 2.2     | 2.0   | 0.8   | 1.9       | 2.1   | 0.8   | 1.4      | 1.4   | 0.5   |
| I32 | 2.9    | 2.7   | 1.1   | 2.1     | 2.1   | 0.5   | 2.0       | 1.9   | 0.6   | 2.0      | 1.5   | 1.1   |
| G33 | 1.5    | 1.4   | 0.6   | 1.3     | 1.1   | 0.5   | 1.2       | 1.0   | 0.5   | 0.8      | 0.6   | 0.5   |
| L34 | 2.4    | 2.4   | 0.7   | 2.1     | 2.1   | 0.6   | 1.8       | 1.6   | 0.6   | 1.4      | 1.2   | 0.6   |
| M35 | 2.5    | 2.5   | 0.9   | 2.0     | 2.0   | 0.8   | 1.7       | 1.5   | 0.8   | 1.1      | 1.1   | 0.5   |

**Table S8.** The 10<sup>th</sup> most favourable and the 8<sup>th</sup> most unfavourable intermonomeric electrostatic stability energies of residue-pairwise interactions, in kcal/mol.<sup>a</sup>

|         | Dimers     | Trimers    | Tetramers  | Octamers    |
|---------|------------|------------|------------|-------------|
| D23-K16 | -15.1±2.0  | -53.0±14.1 | -50.8±6.3  | -117.5±7.9  |
| K28-D23 | -24.8±6.4  | -31.8±6.8  | -45.7±10.3 | -112.5±6.8  |
| K28-E22 | -38.2±22.2 | -34.0±9.2  | -45.5±7.9  | -109.6±8.5  |
| M35-Y10 | -21.3±6.6  | -53.2±15.3 | -53.4±11.2 | -101.8±12.3 |
| M35-K28 | -17.4±2.7  | -34.8±10.8 | -53.0±11.0 | -100.9±13.2 |
| M35-K16 | -33.8±22.9 | -35.7±7.5  | -57.6±12.3 | -100.3±11.9 |
| E22-K16 | -14.7±1.9  | -77.0±12.3 | -58.3±11.6 | -99.4±8.4   |
| K28-E11 | -24.3±13.1 | -31.3±3.5  | -45.1±5.5  | -97.5±7.0   |
| D23-Y10 | -19.3±5.9  | -34.7±3.2  | -49.5±4.2  | -97.3±9.2   |
| E22-Y10 | -21.5±7.9  | -34.5±2.9  | -52.5±7.7  | -94.4±9.4   |
| D23-E22 | 20.1±4.7   | 37.9±9.3   | 41.5±4.9   | 102.5±5.2   |
| K28-K16 | 22.7±7.6   | 37.6±8.0   | 45.9±4.5   | 99.6±5.7    |
| K28-Y10 | 23.4±8.4   | 32.7±3.2   | 49.3±5.6   | 98.6±8.3    |
| M35-E11 | 19.8±4.3   | 41.3±6.2   | 49.3±9.2   | 95.4±12.6   |
| D23-E11 | 16.8±4.5   | 33.2±3.1   | 44.9±4.0   | 93.7±7.1    |
| M35-D23 | 18.6±6.3   | 29.8±4.0   | 45.6±4.9   | 91.9±8.6    |
| M35-E22 | 18.1±4.5   | 29.1±3.2   | 46.3±4.7   | 90.2±7.2    |
| E22-E11 | 17.5±4.4   | 33.2±3.2   | 46.4±3.0   | 90.0±4.7    |

<sup>a</sup> Ranked according the octamer values.



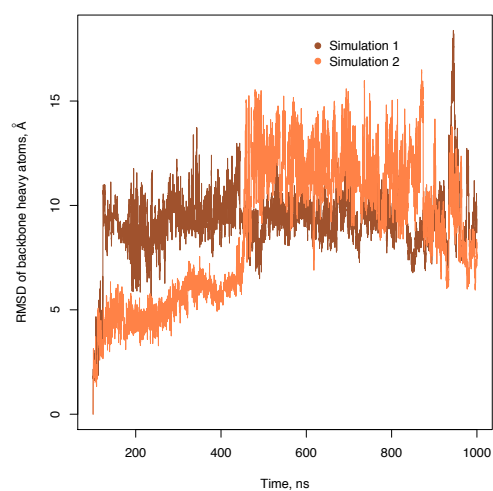

Monomers

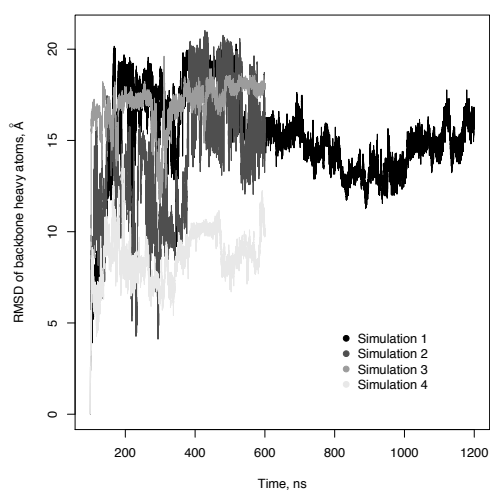

Dimers

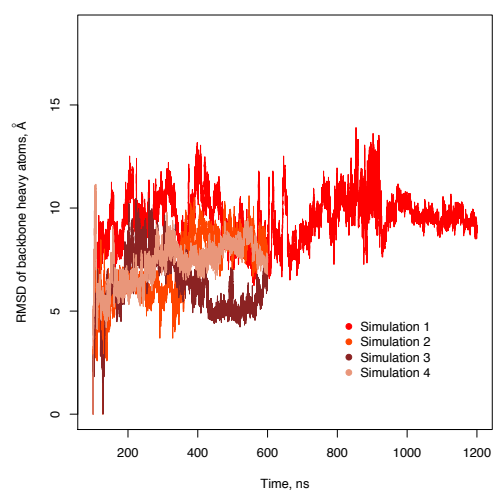

Trimers

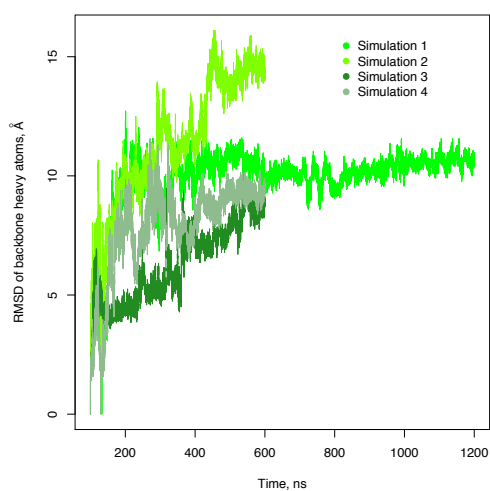

Tetramers

**Figure S1.** RMSD of backbone heavy atoms of all MD 18 simulations

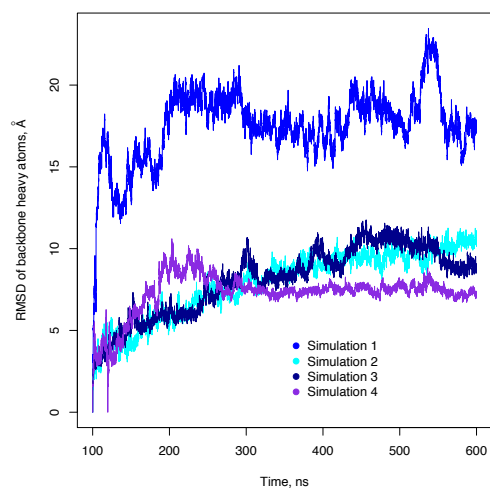

### Octamers

**Figure S1 (cont.).** RMSD of backbone heavy atoms of all MD 18 simulations.

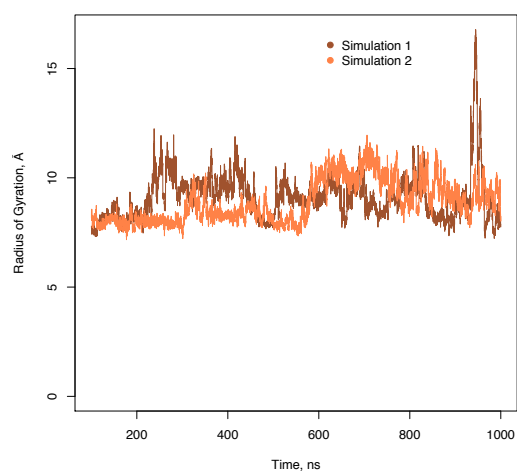

Monomers

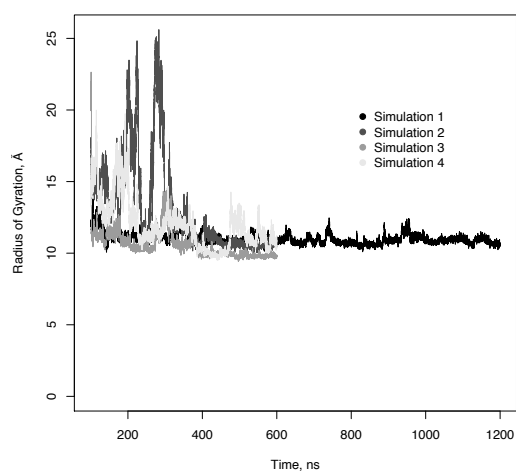

Dimers

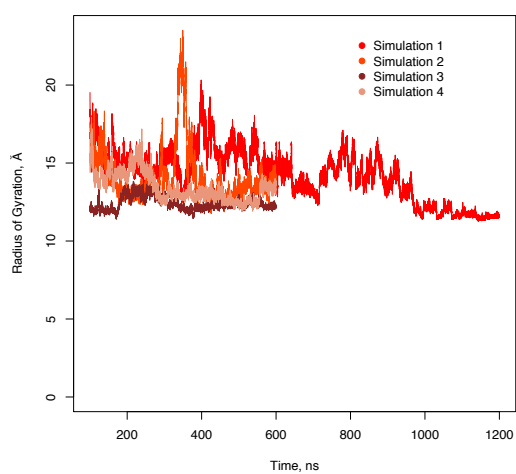

Trimers

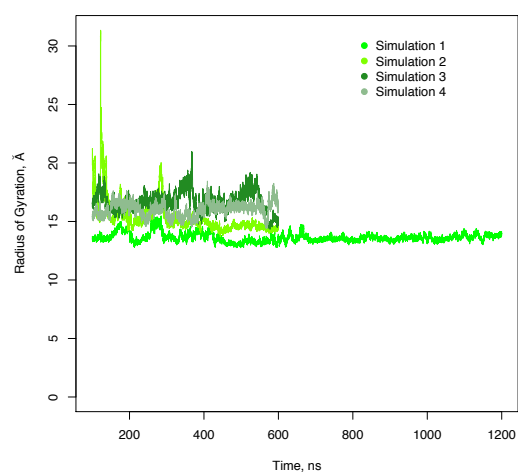

Tetramers

**Figure S2.** Radius of Gyration evolution along the 18 trajectories.

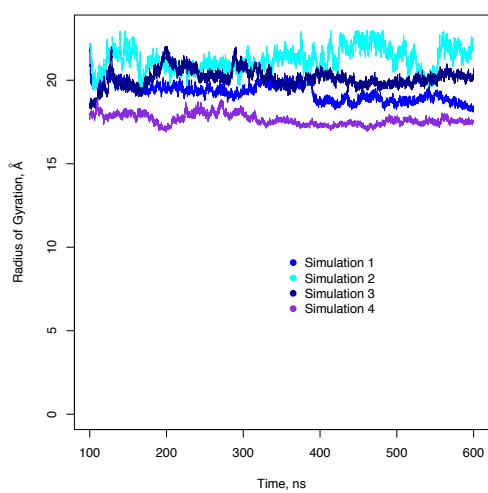

Octamers

**Figure S2 (cont.).** Radius of Gyration evolution along the 18 trajectories.

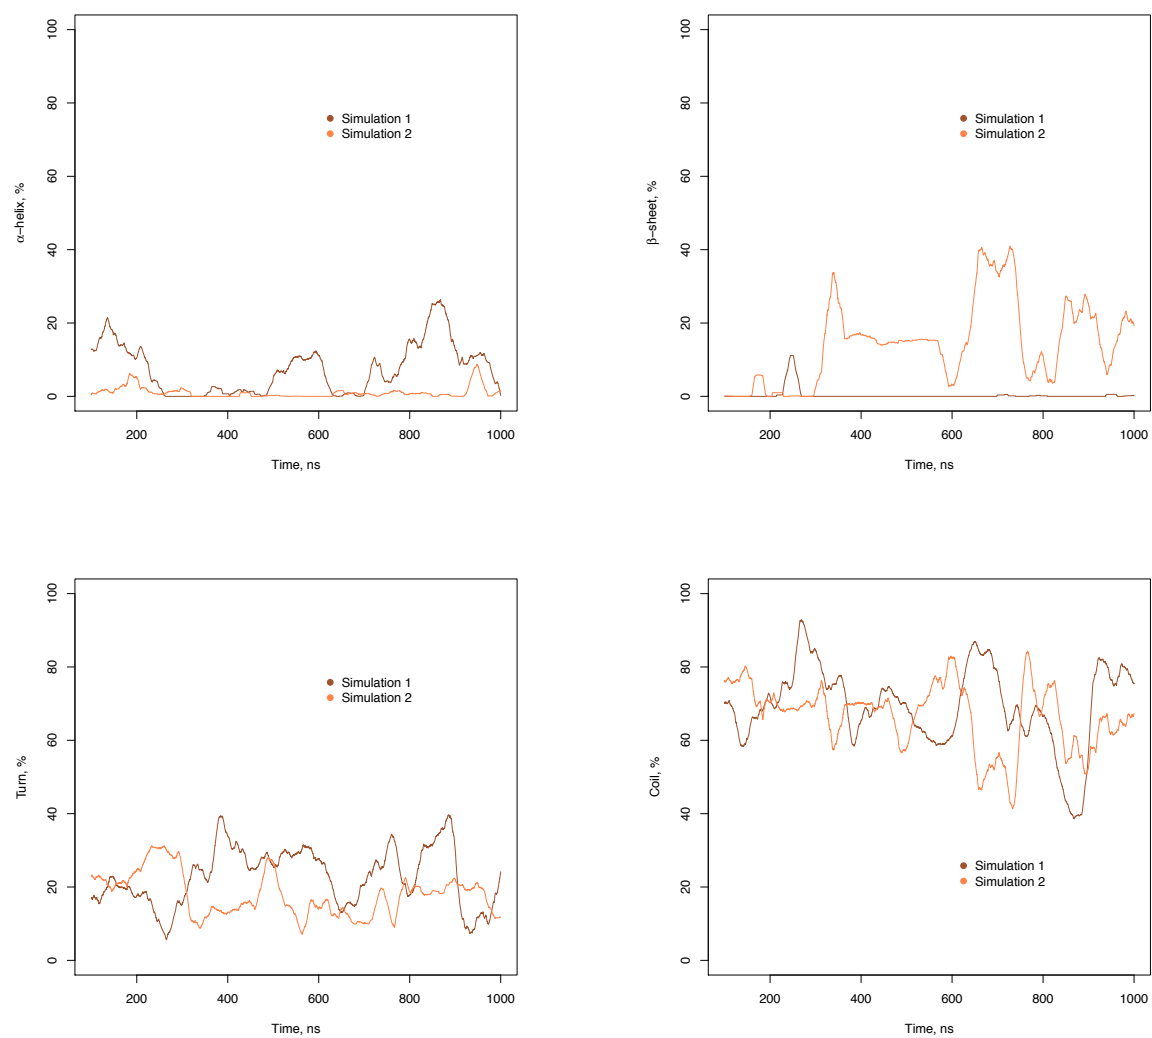

**Figure S3.** Time evolution of the secondary structure elements for monomers.

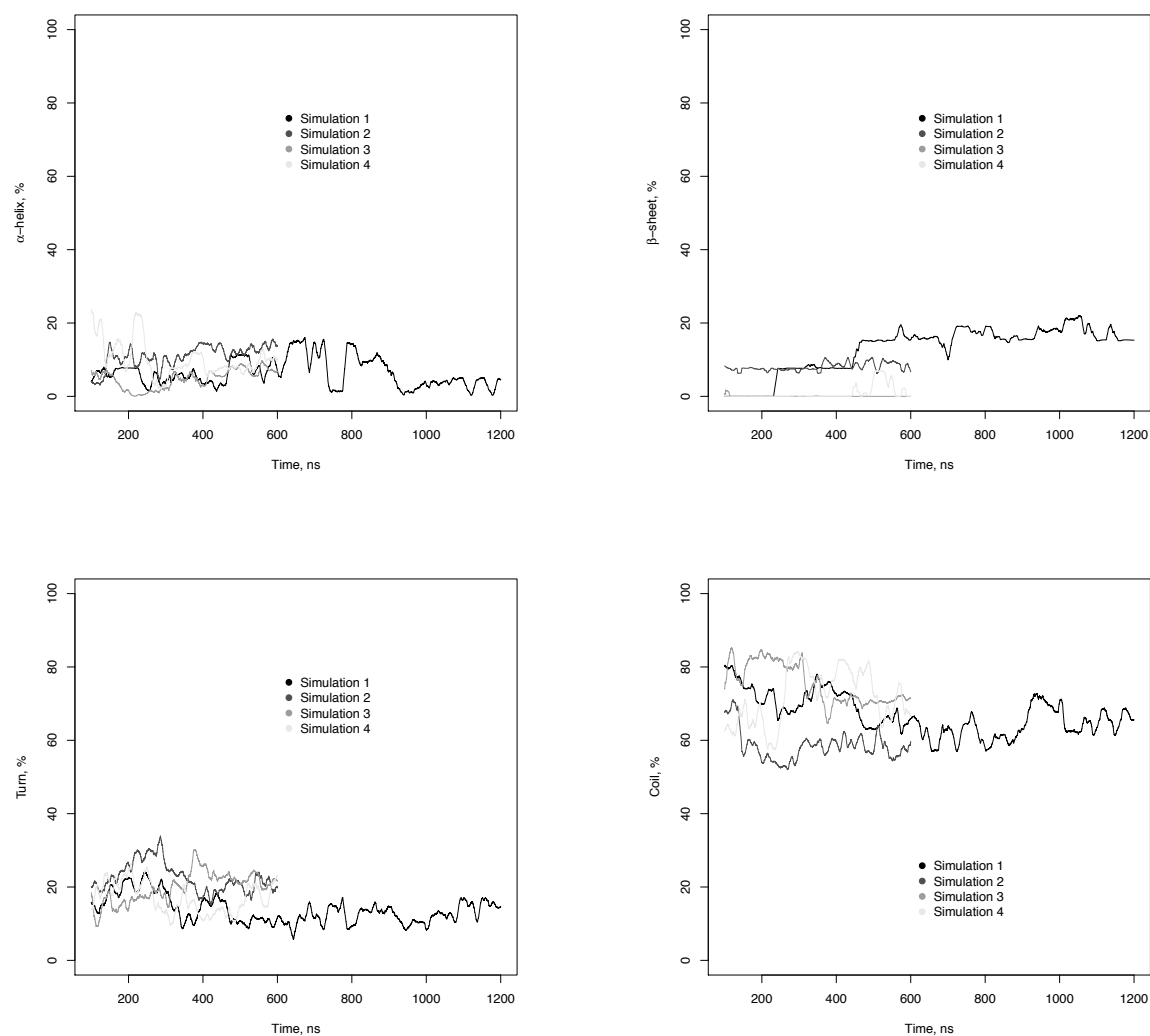

**Figure S4.** Time evolution of the secondary structure elements for dimer oligomers.

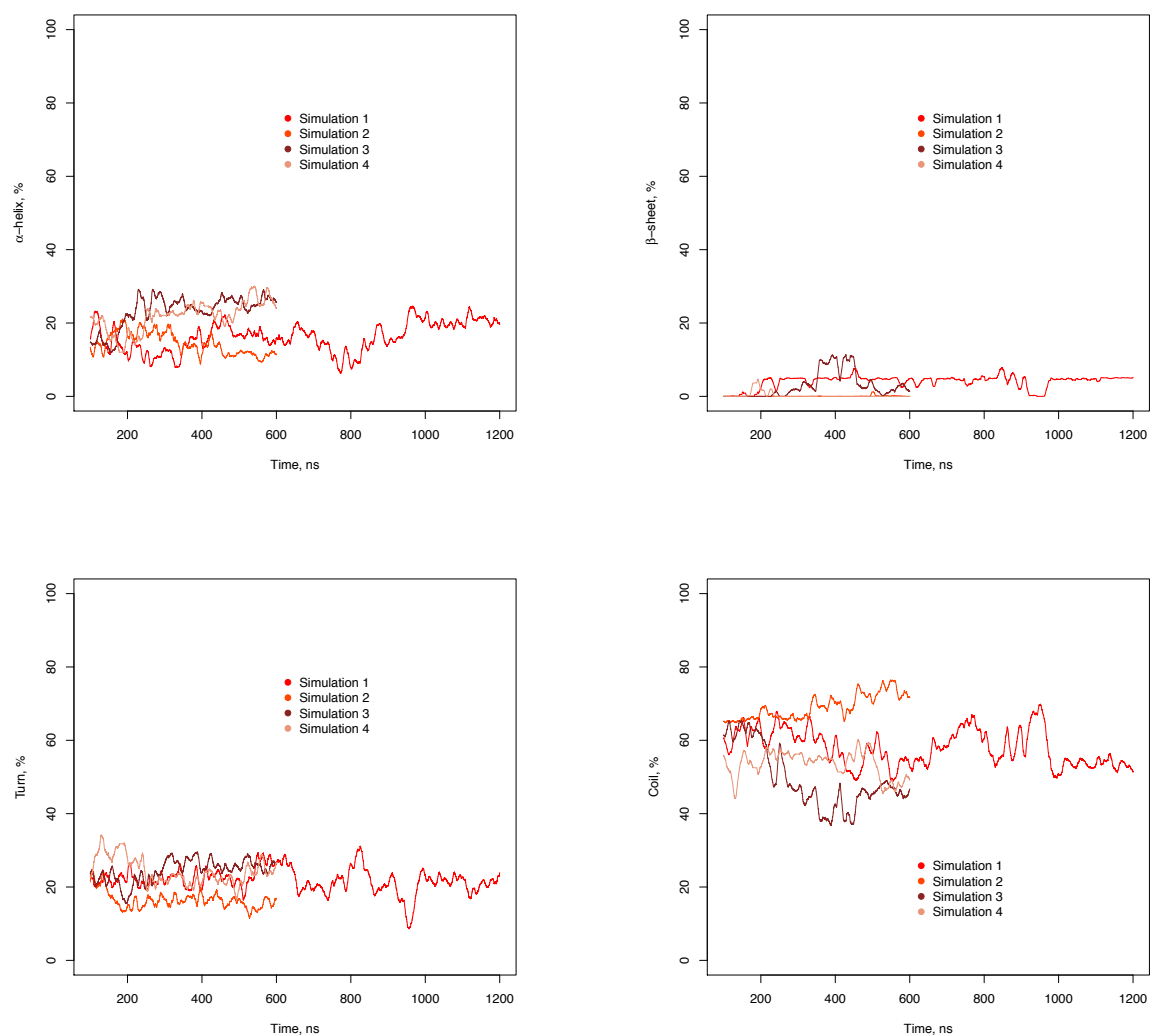

**Figure S5.** Time evolution of the secondary structure elements for trimer oligomers.

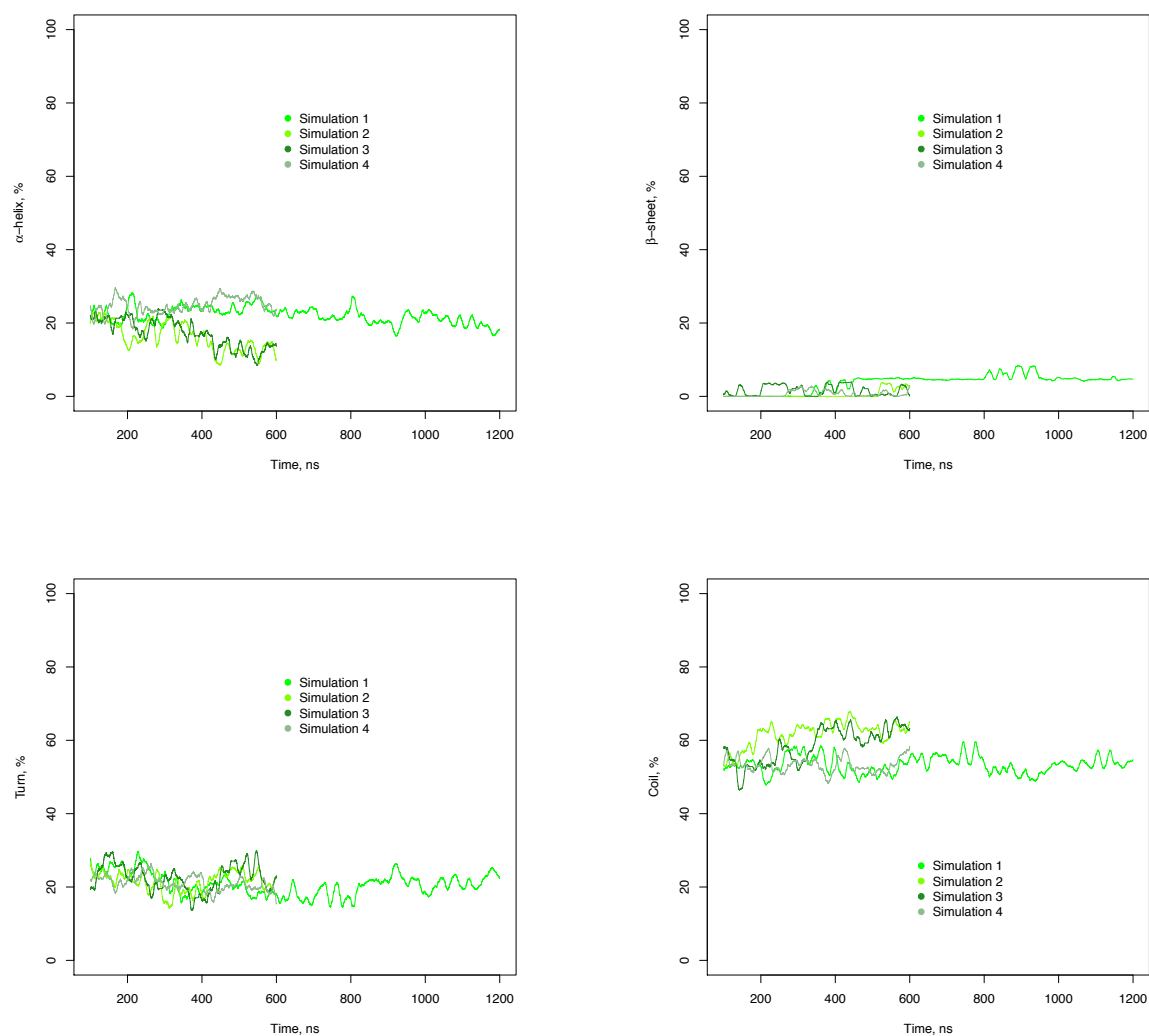

**Figure S6.** Time evolution of the secondary structure elements for tetramer oligomers.



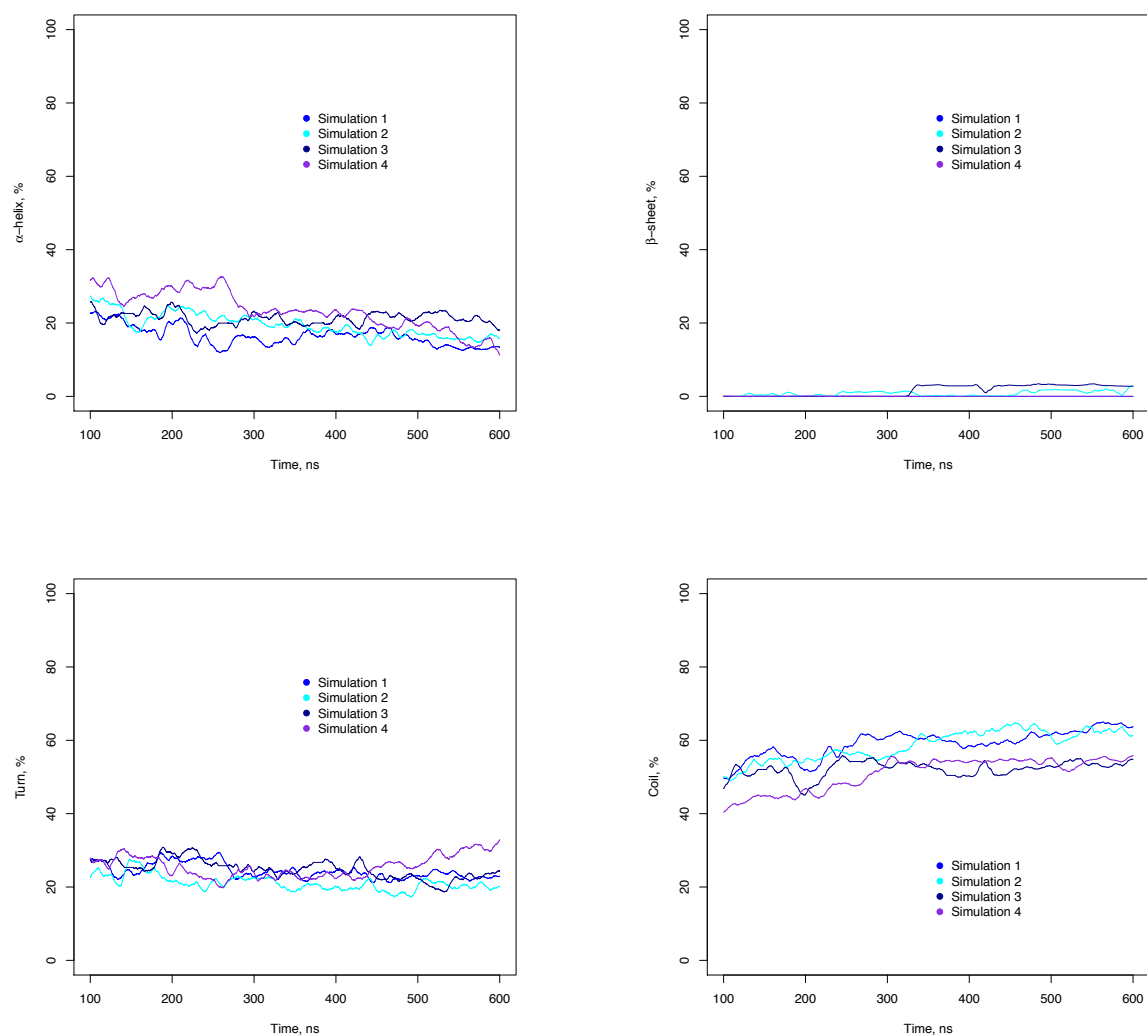

**Figure S7.** Time evolution of the secondary structure elements for octamer oligomers.

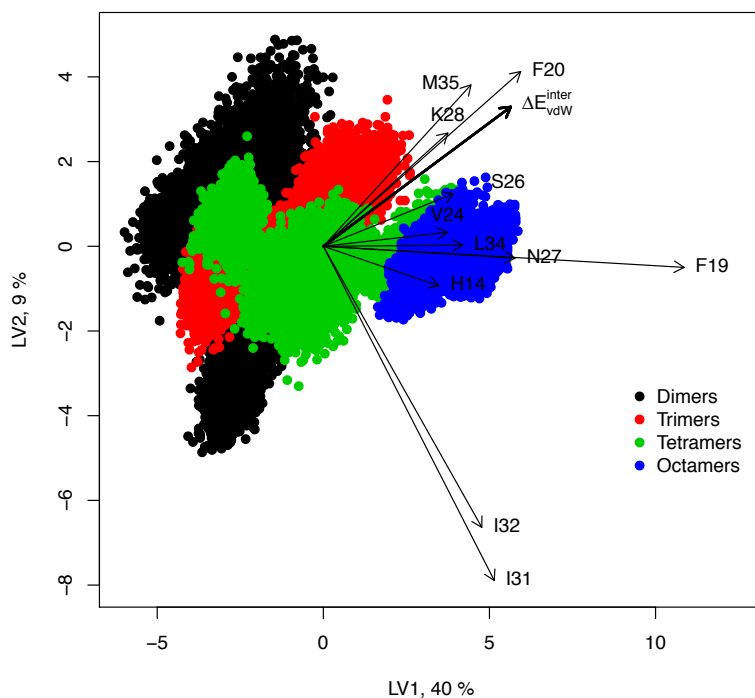

**Figure S8.** PLS biplot of the residue decomposition of the intermonomeric vdW stability energy,  $\Delta E_{vdW}^{inter}$ . Only the 10 most important variables are displayed. The plot reveals firstly a distinctive profile between octamers, which are displayed on the right, and dimers, trimers and tetramers (on the left) and secondly the compactness of octamers structures unlike other oligomers. In the plot, the intermonomeric vdW energy points at octamers oligomers, indicating obviously that this oligomer contains the highest energy of this type among all oligomers and that this direction contains the highest variability of the variable. Correlated to this fact appears the energy profile of H14, F19, I32, I31, M35, F20 and L34 in full agreement with the previous findings and corroborating the importance of the NTHR, CHC and CTHR in which these residues take part.
